# Supplementary material for: High-performance 2D electronic devices enabled by strong and tough two-dimensional polymer with ultra-low dielectric constant
Source: PubMed Central journal article supplement (PMC11685926; doi:10.1038/s41467-024-53935-6), 2024-12-30
Supplement: 41467_2024_53935_MOESM1_ESM.pdf [file 41467_2024_53935_MOESM1_ESM.pdf]

## Supplementary Information

### High performance 2D electronic devices enabled by strong and tough two-dimensional polymer with ultra-low dielectric constant

Qiyi Fang<sup>1,2,#</sup>, Kongyang Yi<sup>3,#</sup>, Tianshu Zhai<sup>1,#</sup>, Shisong Luo<sup>4</sup>, Chen-yang Lin<sup>1</sup>, Qing Ai<sup>1</sup>, Yifan Zhu<sup>1</sup>, Boyu Zhang<sup>1</sup>, Gustavo A. Alvarez<sup>5</sup>, Yanjie Shao<sup>6</sup>, Haolei Zhou<sup>2</sup>, Guanhui Gao<sup>1</sup>, Yifeng Liu<sup>1</sup>, Rui Xu<sup>1</sup>, Xiang Zhang<sup>1</sup>, Yuzhe Wang<sup>2</sup>, Xiaoyin Tian<sup>1</sup>, Honghu Zhang<sup>7</sup>, Yimo Han<sup>1</sup>, Hanyu Zhu<sup>1</sup>, Yuji Zhao<sup>4</sup>, Zhiting Tian<sup>5</sup>, Yu Zhong<sup>2</sup>, Zheng Liu<sup>3,\*</sup>, Jun Lou<sup>1,\*</sup>

<sup>1</sup>Department of Materials Science and NanoEngineering, Rice University, Houston, TX 77005, USA.

<sup>2</sup>Department of Materials Science and Engineering, Cornell University, Ithaca, NY 14853, USA.

<sup>3</sup>School of Materials Science and Engineering, Nanyang Technological University, Singapore 639798, Singapore.

<sup>4</sup>Department of Electrical and Computer Engineering, Rice University, Houston, TX 77005, USA.

<sup>5</sup>Sibley School of Mechanical and Aerospace Engineering, Cornell University, Ithaca, NY 14853, USA.

<sup>6</sup>Department of Electrical Engineering and Computer Science, Massachusetts Institute of Technology, Cambridge, MA 02139, USA

<sup>7</sup>National Synchrotron Light Source II, Brookhaven National Laboratory, Upton, NY 11973, USA.

#These authors contribute equally: Qiyi Fang, Kongyang Yi, Tianshu Zhai

\*Correspondence: [jlou@rice.edu](mailto:jlou@rice.edu), [z.liu@ntu.edu.sg](mailto:z.liu@ntu.edu.sg)

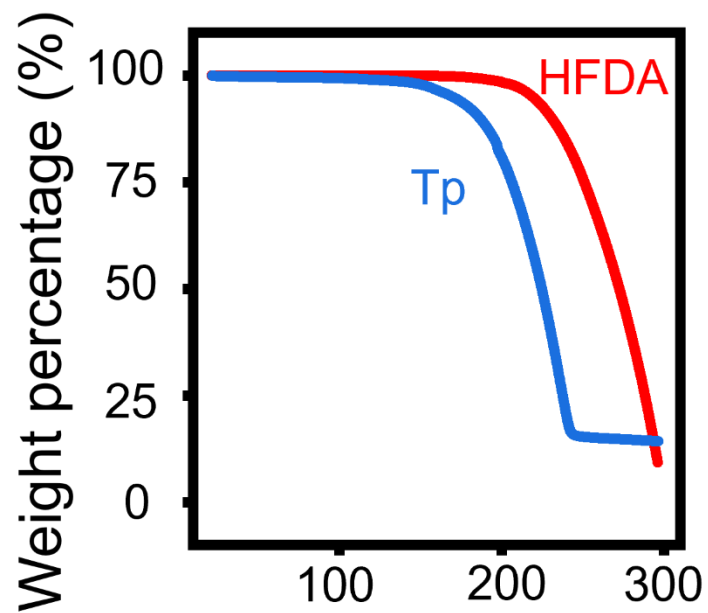

**Supplementary Figure 1.** TGA curves of Tp and HFDA. Both monomers begin to lose weight below 300°C.

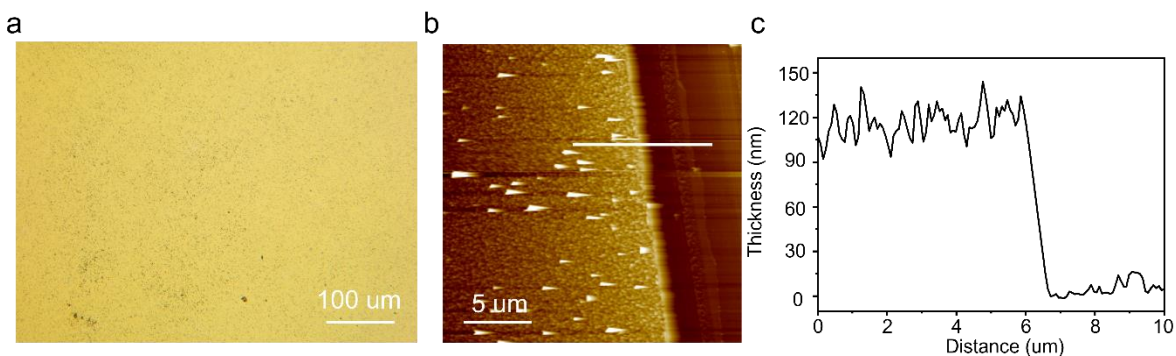

**Supplementary Figure 2.** (a) Optical image of solution grown 2DP-F. In brief, 2ml solutions of Tp (2mM) and HFDA(3mM) in acetonitrile were mixed and 0.2 ml of 6M AcOH was added. A desired substrate (sapphire in this case) was added into the solution and kept at room temperature for 3 days. A yellow film of 2DP-F on sapphire was picked out, washed with Acetonitrile for 3 times and dried under ambient for further characterization. (b) AFM image of solution grown 2DP-F film and (c) corresponding line profile.

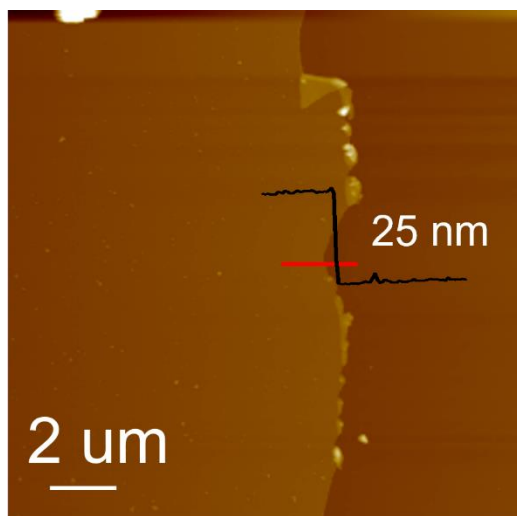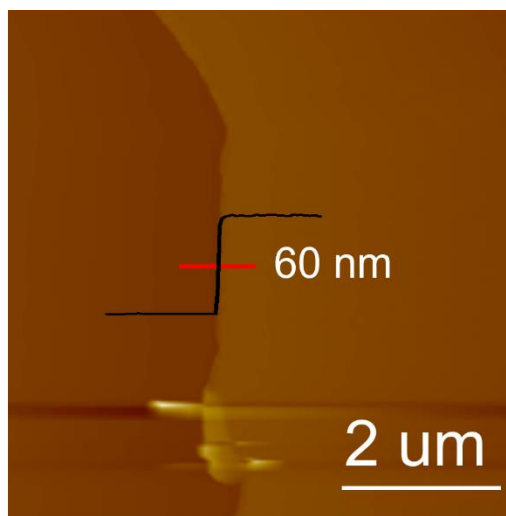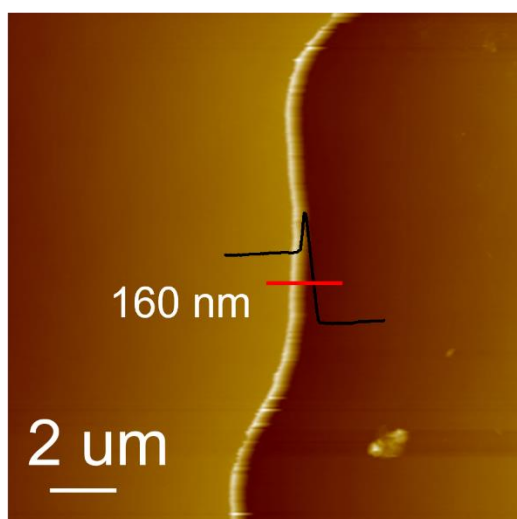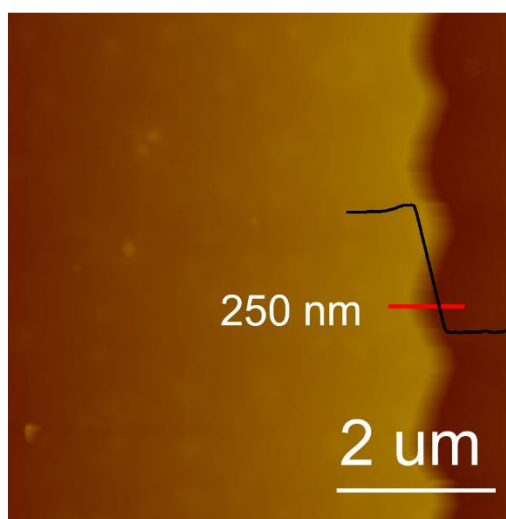

**Supplementary Figure 3.** AFM image of 2DP-F film ranging from 25nm to 250nm. Both films exhibited smooth and uniform surface.

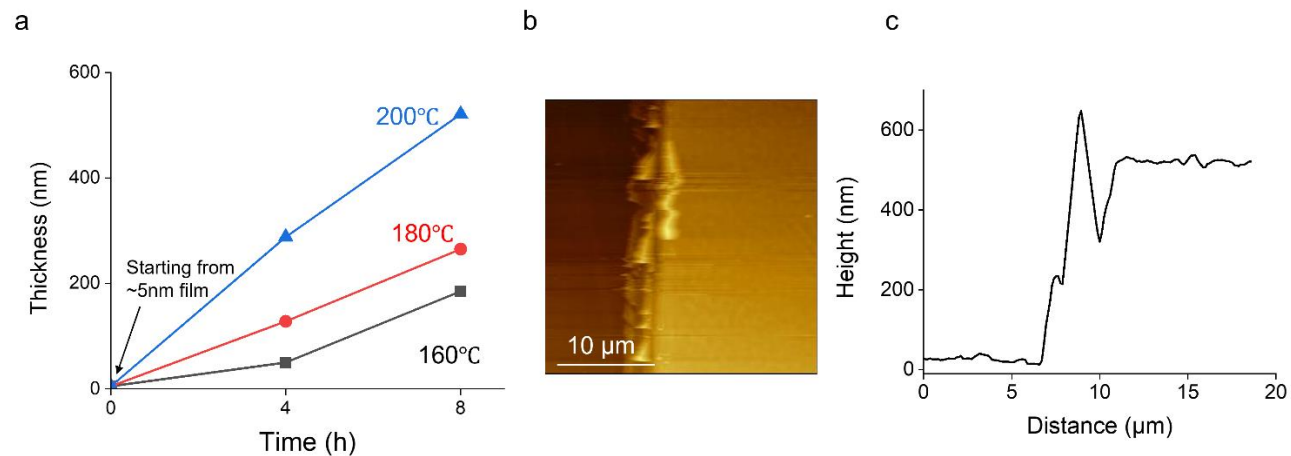

**Supplementary Figure 4.** (a) Thickness of the 2DP-F film as a function of growth time and temperature when using 5nm 2DP-F thin film as starting substrate and 3M AcOH (aq) as catalyst. (b) AFM image of a 530 nm thick 2DP-F film and (c) corresponding line profile.

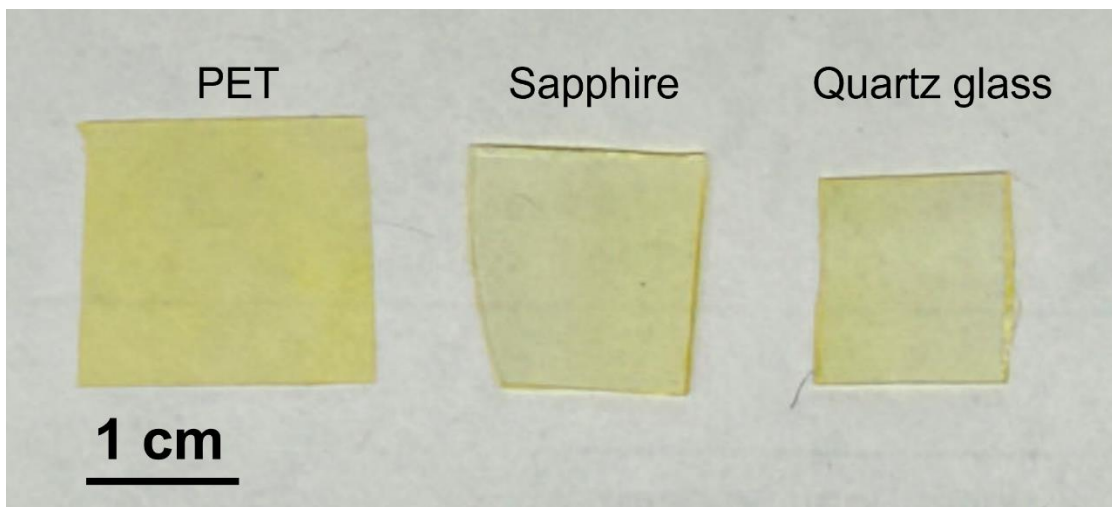

**Supplementary Figure 5.** Photograph of 2DP-F film grown in other transparent substrates.

I) Direct photolithography

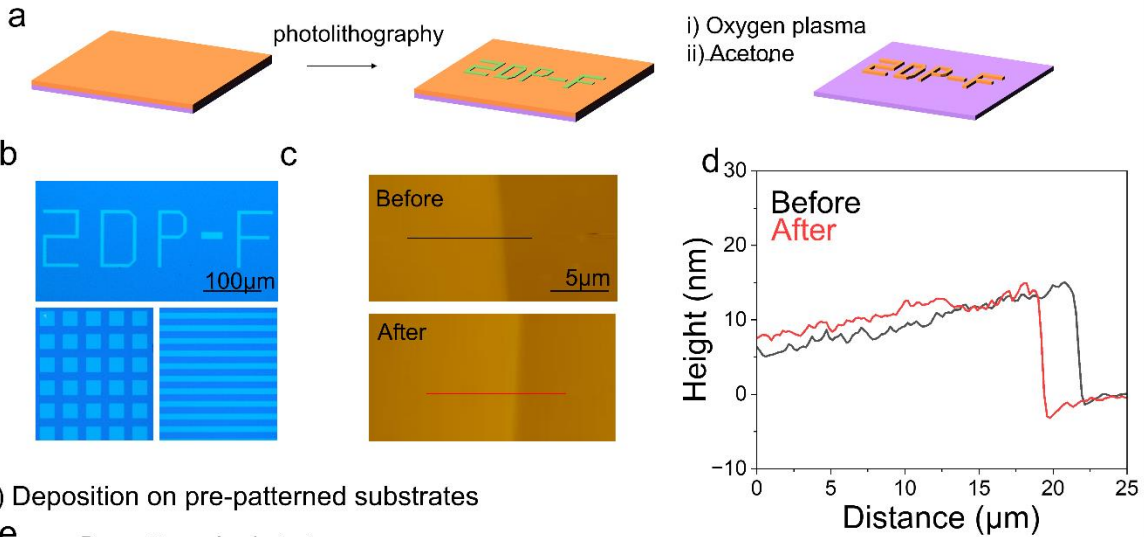

II) Deposition on pre-patterned substrates

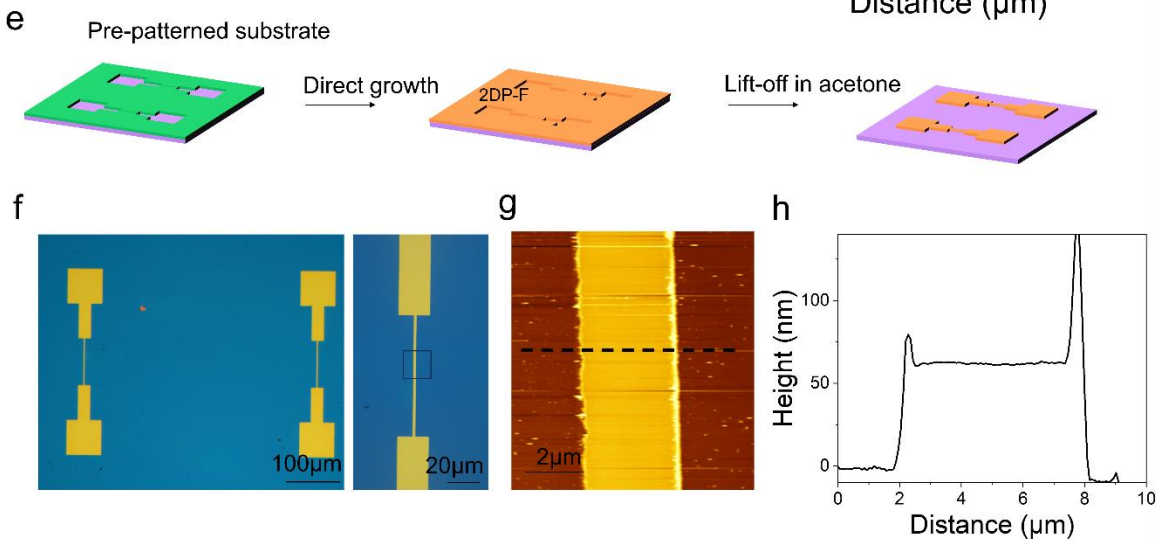

**Supplementary Figure 6.** (a) Schematic illustration of direct photolithography on 2DP-F films. (b) Optical image of patterned 2DP-F films. (c) AFM image of 2DP-F film before and after patterning and (d) Corresponding line profile. (e) Schematic illustration of patterning 2DP-F by direct deposition of 2DP-F on patterned substrates. (f) Optical image of the 2DP-F film after lift-off in acetone with ultrasonication. (g) AFM image of the area highlighted in black square and (h) Corresponding line profile.

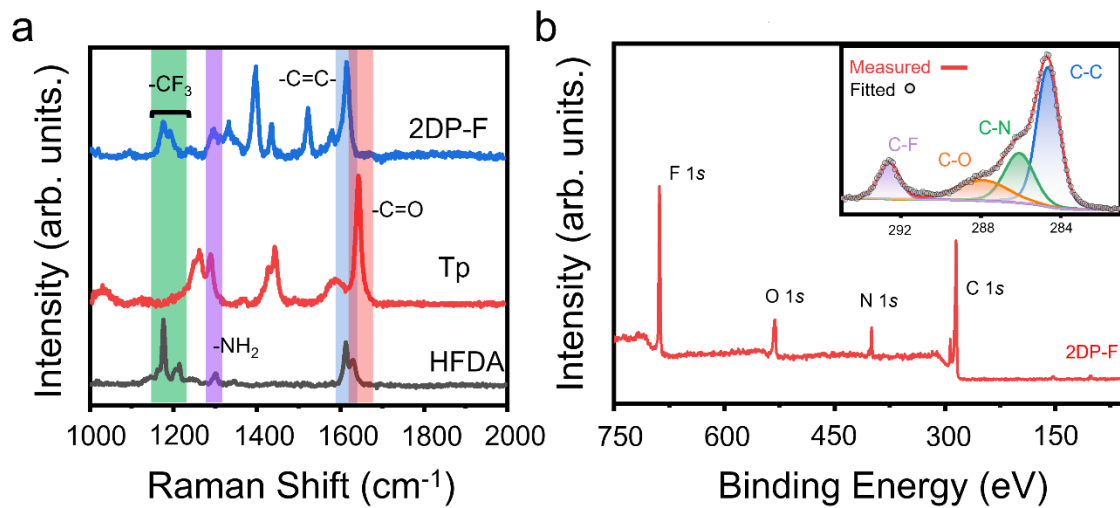

**Supplementary Figure 7.** (a) Raman spectra of 2DP-F film and monomers. (b) survey XPS of 2DP-F film. (inset: XPS spectrum of C1S signal from 2DP-F).



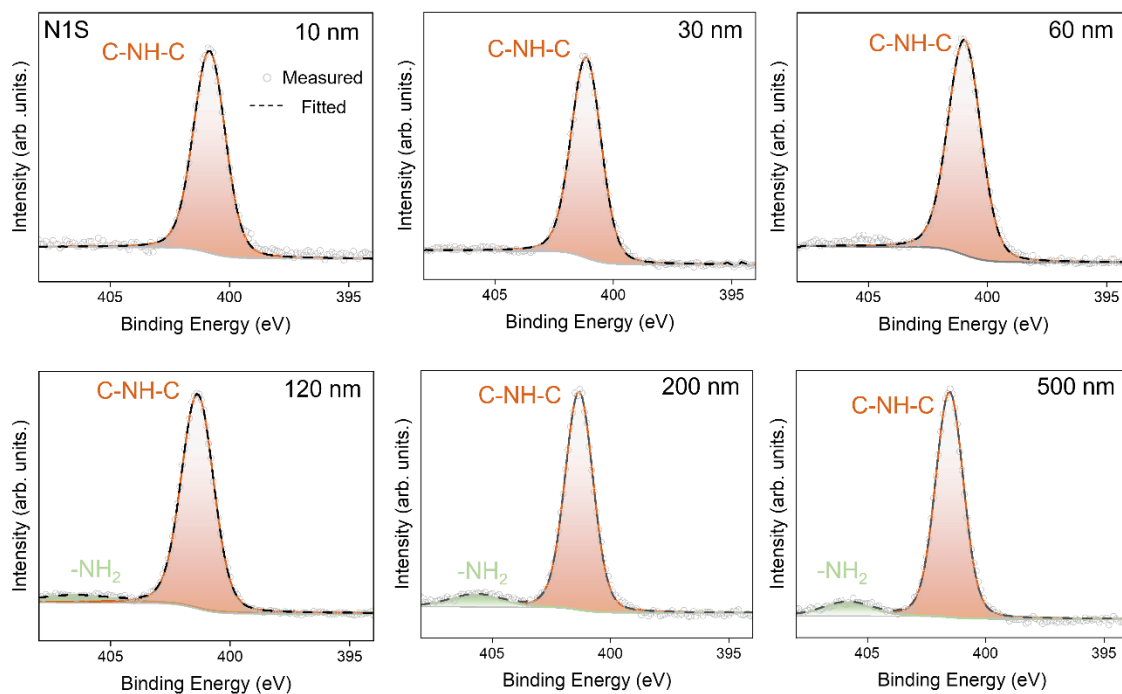

**Supplementary Figure 8.** Thickness-dependent XPS N1s spectra of 2DP-F films. The result indicates that some unreacted amino groups are present when the thickness is larger than 100 nm.

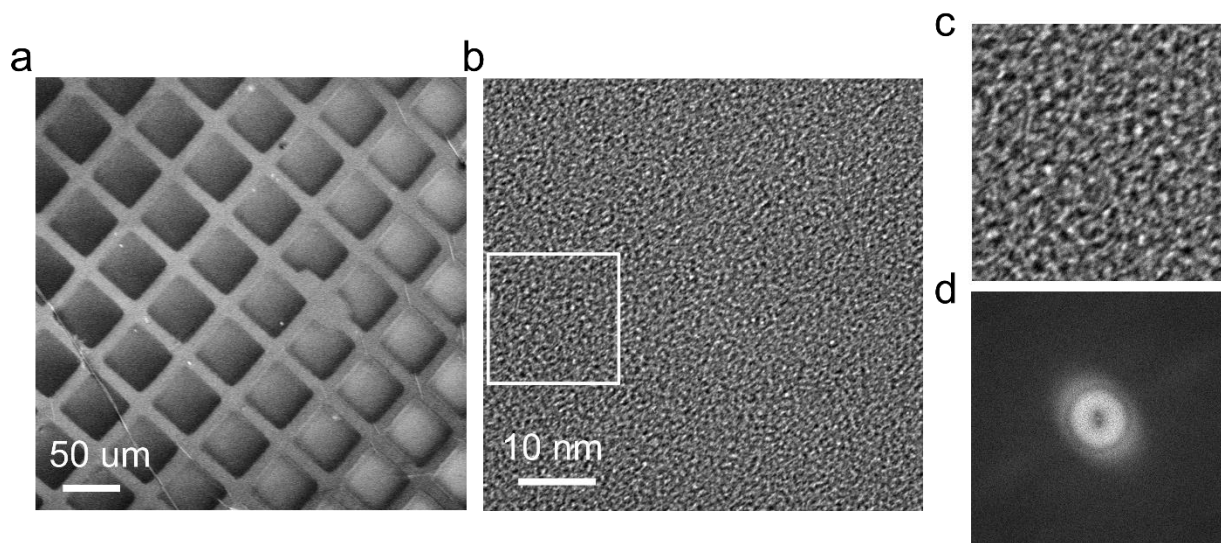

**Supplementary Figure 9.** (a). SEM image of a 20 nm 2DP-F suspended on a TEM grid. (b) High-resolution TEM image of suspended 2DP-F film. (c). A magnified view of the area indicated by the white box in b shows an amorphous structure. (d). FFT result of the area in (c) demonstrating a diffuse diffraction pattern of the amorphous structure.

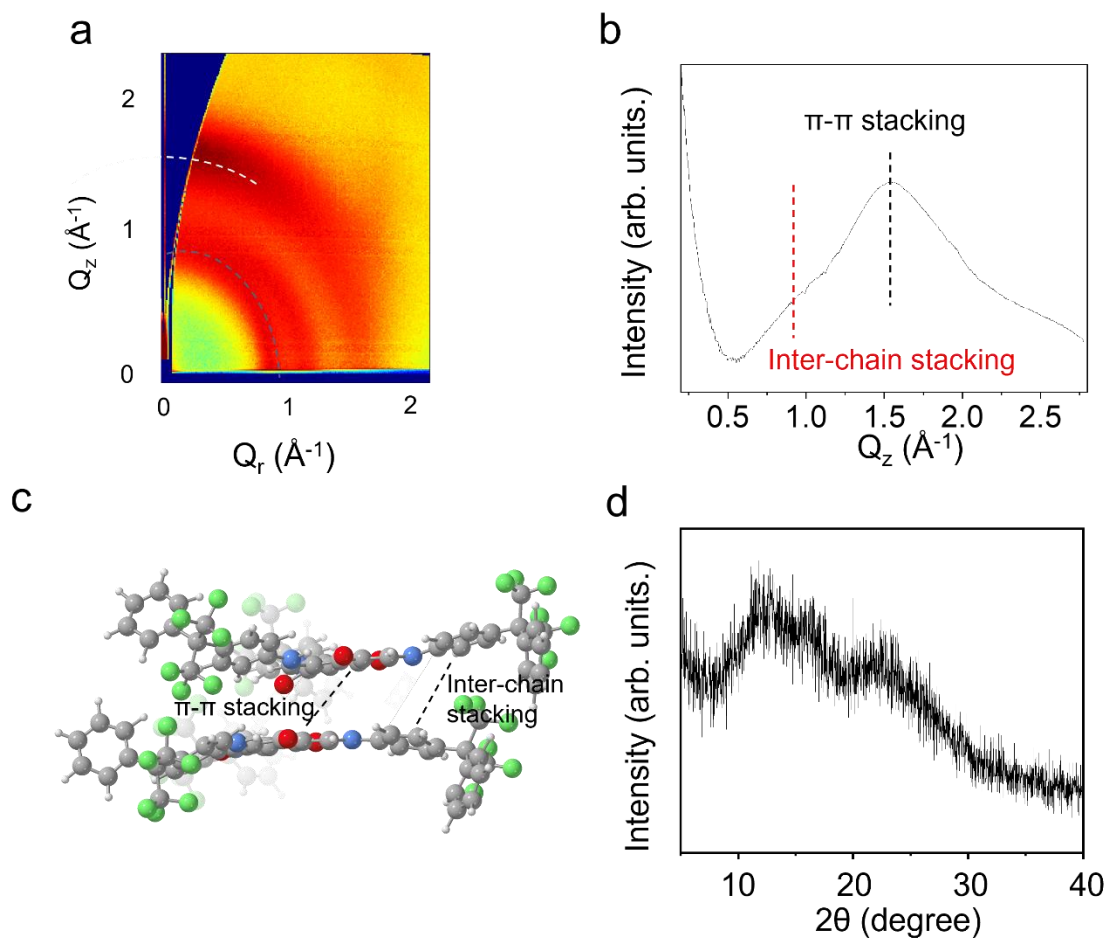

**Supplementary Figure 10.** (a)GIWAXS scattering 2D image and (b) its intensity profile near  $Q_r=0$ . (c) molecular structure of a building unit in 2DP-F. (d) PXRD of 2DP-F powder collected after the reaction.

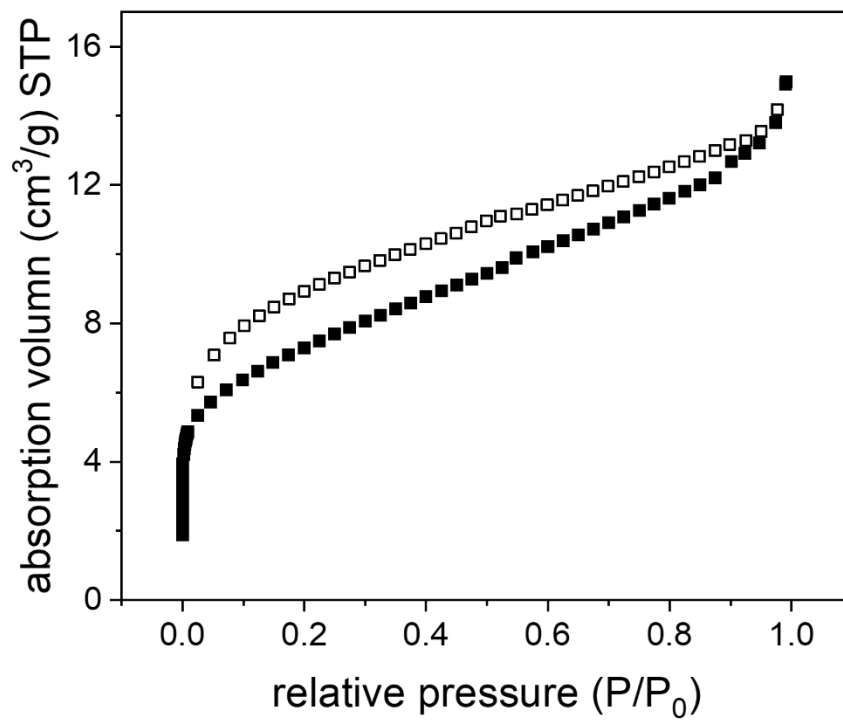

**Supplementary Figure 11.** Nitrogen sorption curves for 2DP-F powder.

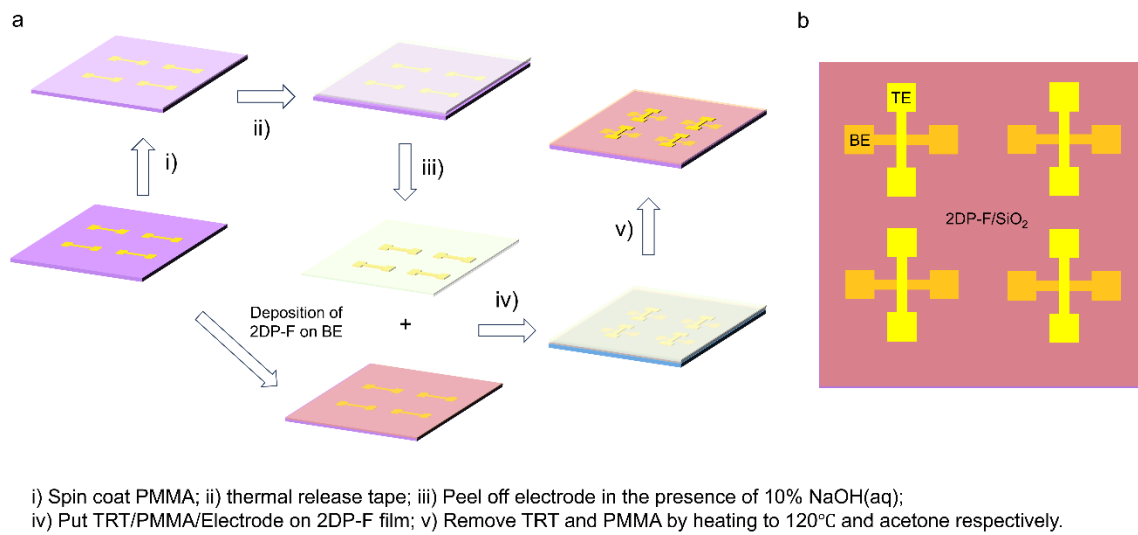

**Supplementary Figure 12.** Schematical illustration of the “dry-transfer” method to fabricate MIM devices based on 2DP-F.

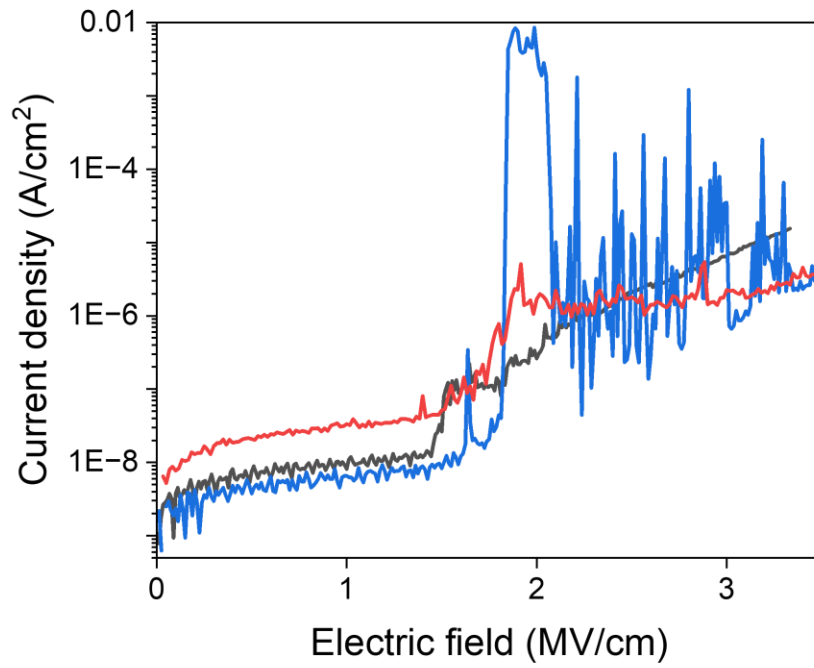

**Supplementary Figure 13.** Leakage current density versus the applied electrical field across the MIM devices based on 2DP-F with different thicknesses.

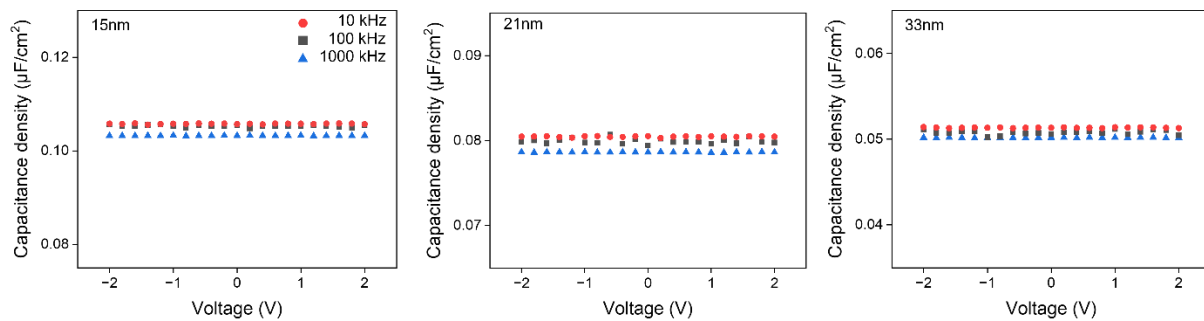

**Supplementary Figure 14.** Capacitance-voltage (C-V) characteristic of 2DP-F parallel capacitors with different thicknesses.

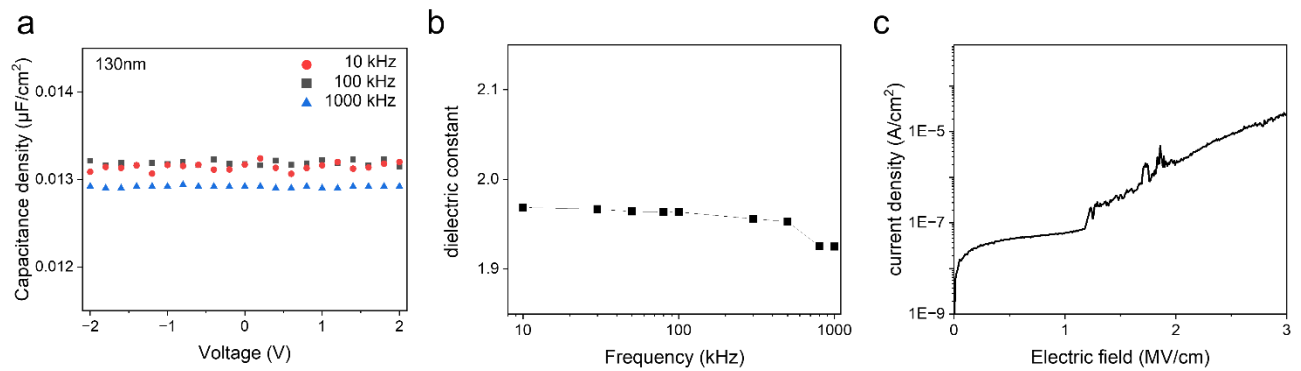

**Supplementary Figure 15.** (a) Capacitance-voltage (C-V) characteristic, (b) C-f characteristic, and (c) leakage current of 2DP-F MIM device prepared using the direct metal deposition method.



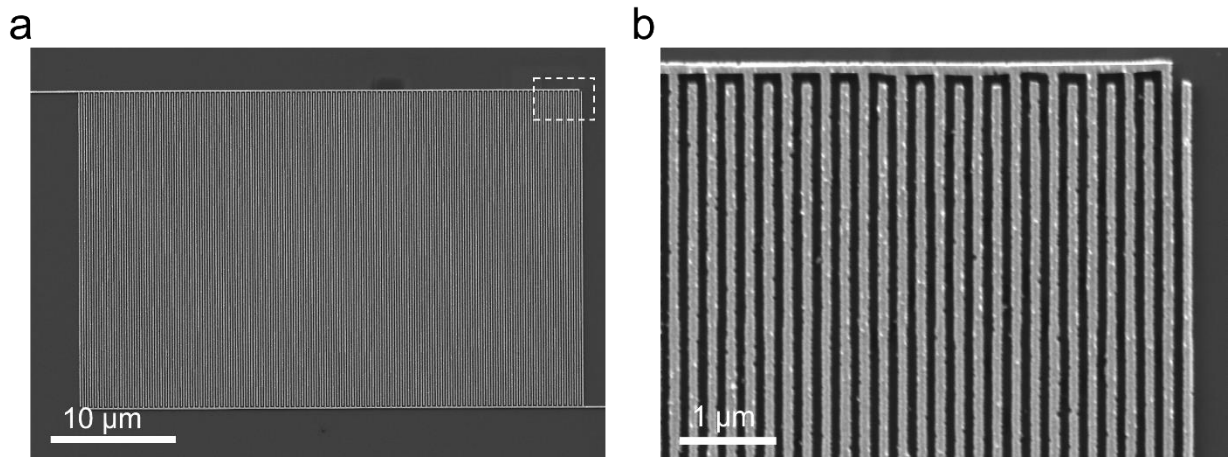

**Supplementary Figure 16.** (a). SEM image of the interdigital capacitors and (b) magnification of the area indicated by the white box in a.

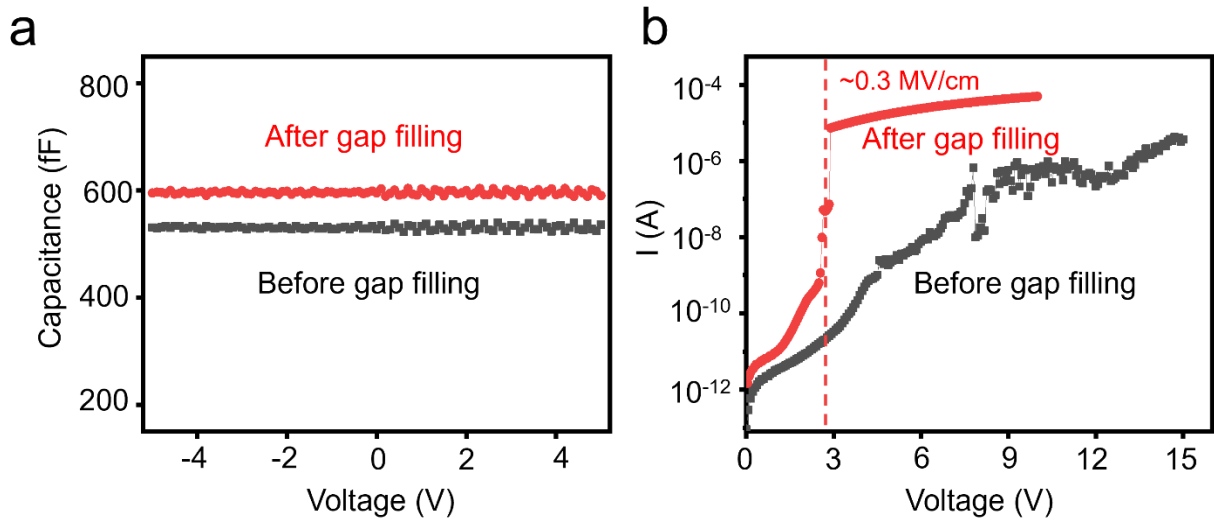

**Supplementary Figure 17.** (a). C-V characteristic of interdigitated capacitors before and after gap filling. (b) breakdown of the interdigitated capacitors.

**a**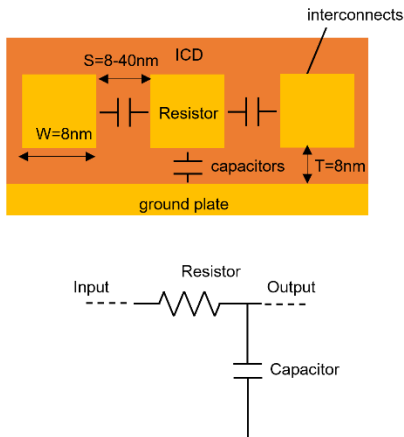**b**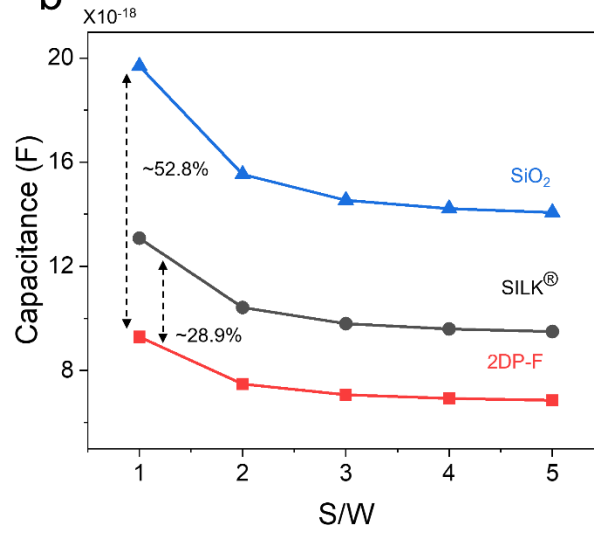

**Supplementary Figure 18.** (a). Schematic of a simplified Cu interconnect structure (top) and corresponding equivalent circuit used for the Silvaco TCAD simulation. (b) Interconnect parasitic capacitance reduction by substituting silicon oxide and SILK<sup>®</sup> with 2DP-F.

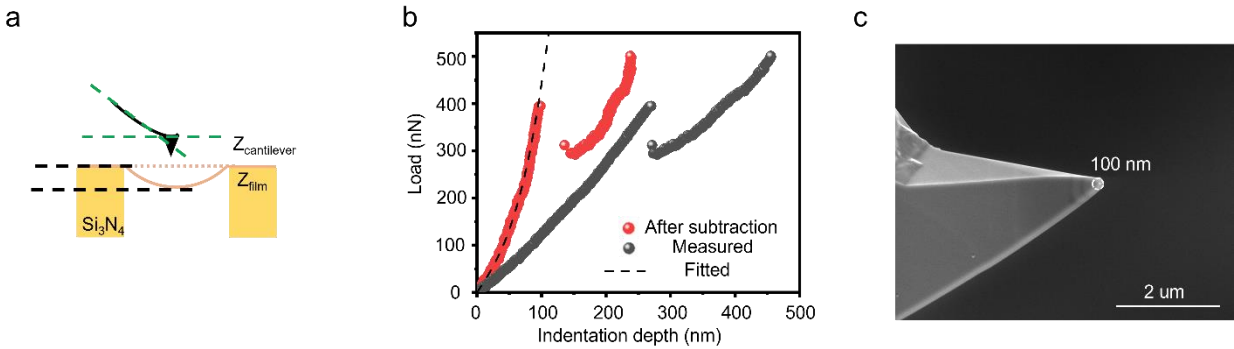

**Supplementary Figure 19.** (a). Schematic illustration of the indentation test. The displacement of the AFM tip includes two parts. (1) deformation of the AFM cantilever, and it can be expressed as  $Z_{\text{cantilever}}=F/Kc.$ , where  $F$  is the load and  $Kc$  is the stiffness of the cantilever. (2) deflection of the thin film, and it can be expressed as  $Z_{\text{film}}=\text{displacement}-Z_{\text{cantilever}}$ , and the load-deflection curves of the film can be obtained by subtracting cantilever deformation, as illustrated in b. c. SEM image of the AFM tip.

a

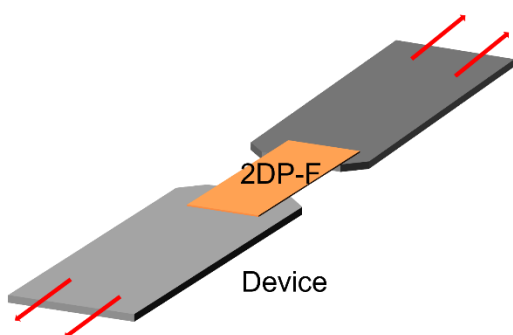

b

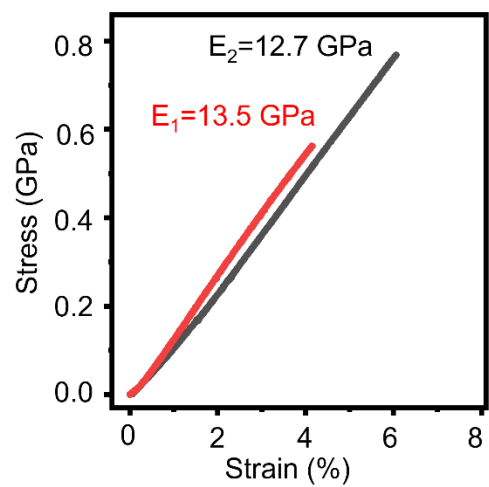

**Supplementary Figure 20.** (a) Schematic illustration of the tensile test of 2DP-F film. (b) Strain-stress curves of a 40 nm 2DP-F film. The highest Young's modulus reaches 13.5 GPa.

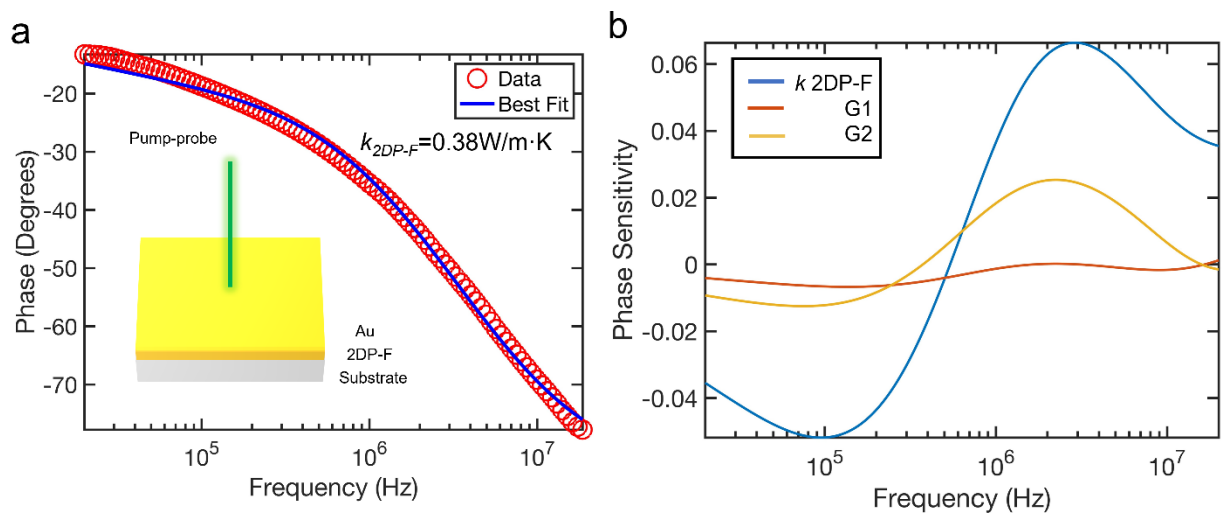

**Supplementary Figure 21.** (a) Phase lag vs. frequency data obtained from FDTR measurements shows a good approximation to the calculated best-fit curve. Each measurement is an average of three runs. (inset: schematic of FDTR measurement). (b) Sensitivity analysis of the thermal conductivity  $k$  of the COF, the thermal boundary conductance  $G1$  between Au and the COF, and  $G2$  between the COF and the substrate.  $k$  of the COF is highly sensitive throughout the frequency range of our measurement.

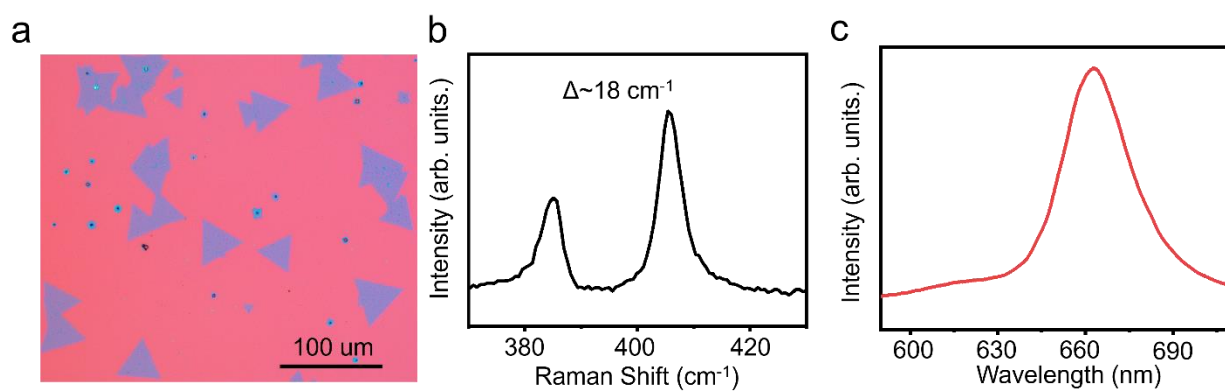

**Supplementary Figure 22.** (a) Optical image of CVD-grown MoS<sub>2</sub> crystals. (b) Raman and (c) PL spectrum of monolayer MoS<sub>2</sub>.

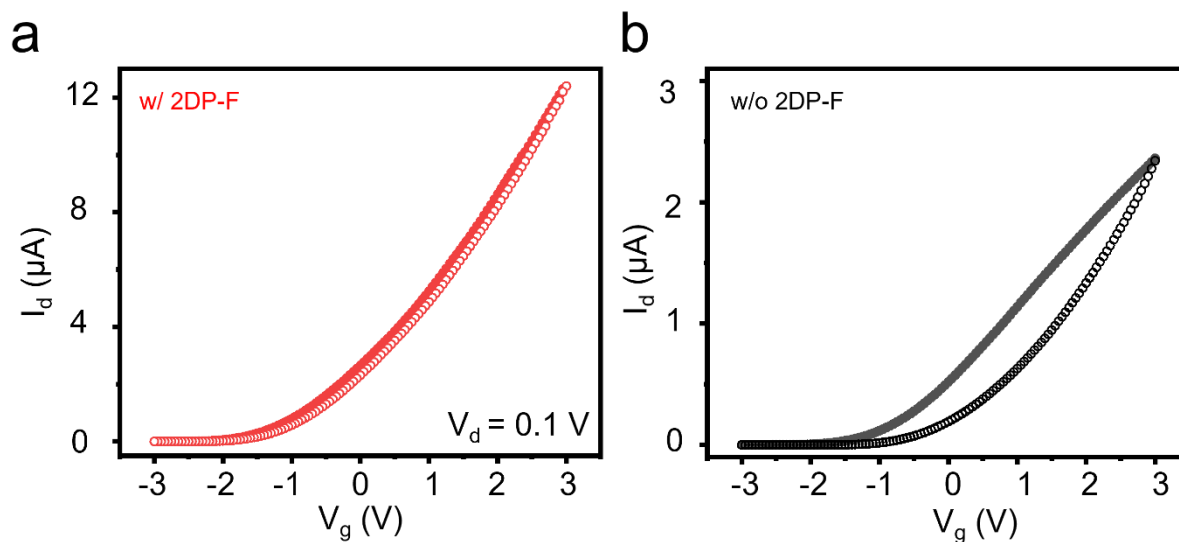

**Supplementary Figure 23.** Transfer curve of MoS<sub>2</sub> a. with and b. without 2DP-F film dielectric layer, demonstrating that 2DP-F significantly suppressed the hysteresis induced by oxides.



| Category    | Materials                              | k    | YM(GPa) | Density (g/cm <sup>3</sup> ) | Normalized YM | reference |
|-------------|----------------------------------------|------|---------|------------------------------|---------------|-----------|
| MOFs        | ZIF-67                                 | 2.39 | 3.79    | 0.94                         | 4.03          | 1         |
|             | ZIF-8                                  | 2.23 | 3.15    | 0.96                         | 3.28          |           |
|             | ZIF-8                                  | 2.33 | 3       | 0.96                         | 3.125         | 2         |
|             | HKUST-1                                | 2.8  | 22      | 1.07                         | 20.56         | 3         |
| PSZs        | PSZ-MFI film                           | 2.7  | 53.9    | 1.76                         | 30.625        | 4         |
|             | PSZ-FER crystal                        | 1.78 | 49.4    | /                            |               |           |
|             | PSZ MFI film on gold                   | 1.71 | 54      | 1.76                         | 30.625        | 5         |
| Porous OSGs | 22 C:H                                 | 2.25 | 4.5     | 0.7                          | 6.428         | 6         |
|             | 625-SiOC:H                             | 2.2  | 4.5     | 0.9                          | 5             |           |
|             | 186-SiOC:H                             | 2.25 | 5.1     | 0.9                          | 5.67          |           |
|             | 322-SiOC:H                             | 2.2  | 5.4     | 0.9                          | 6             |           |
|             | 94-SiOC:H                              | 2    | 4.4     | 0.7                          | 6.29          |           |
|             | Si <sub>0.2</sub> C <sub>0.8</sub> H#1 | 3.2  | 3.5     | 1.15                         | 3.04          | 7         |
|             | Si <sub>0.2</sub> C <sub>0.8</sub> H#2 | 3.2  | 4.8     | 1.15                         | 4.12          |           |
|             | Si <sub>0.2</sub> C <sub>0.8</sub> H#3 | 2.85 | 6.8     | 1.15                         | 5.91          |           |
|             | SiOC:H#1                               | 2.55 | 5.9     | 1.1                          | 5.36          |           |
|             | SiOC:H#2                               | 2.6  | 5.7     | 1.1                          | 5.18          |           |
|             | SiOC:H#3                               | 2.5  | 8.3     | 1.25                         | 6.64          |           |
|             | SiOC:H#4                               | 2.5  | 8.7     | 1.25                         | 6.96          |           |
|             | c-T8B8                                 | 2.25 | 2.35    | 1.191                        | 1.97          | 8         |
|             | c-T10B10                               | 2.03 | 2.97    | 1.182                        | 2.51          |           |
|             | c-T12B12                               | 1.83 | 3.35    | 1.176                        | 2.85          |           |
|             | c-T8PB8                                | 2.30 | 2.5     | 1.141                        | 2.19          |           |
|             | c-T10PB10                              | 2.10 | 2.4     | 1.125                        | 2.13          |           |
|             | c-T12PB12                              | 1.93 | 2.43    | 1.119                        | 2.17          |           |
|             | c-T8F8                                 | 2.52 | 2.36    | 1.281                        | 1.84          |           |
|             | c-T10F10                               | 2.33 | 2.51    | 1.274                        | 1.97          |           |
| c-T12F12    | 2.14                                   | 2.69 | 1.266   | 2.12                         |               |           |
|             | TmBPHF                                 | 2.1  | 2.02    | 1.21                         | 1.67          |           |
|             | p-DBCOD-BCB                            | 2.66 | 3.7     |                              |               | 10        |

|          |                             |      |      |       |      |               |
|----------|-----------------------------|------|------|-------|------|---------------|
| polymers | p-DBCOD-ene-BCB             | 2.54 | 3.8  |       |      |               |
|          | PI-FH                       | 2.05 | 2.11 | 1.42  | 1.49 | <sup>11</sup> |
|          | PI-FO                       | 2.76 | 2.42 | 1.42  | 1.70 |               |
|          | PI-FP                       | 2.92 | 2.86 | 1.42  | 2.01 |               |
|          | 6FDA-PFODA-trans            | 2.42 | 2.5  | 1.246 | 2.00 | <sup>12</sup> |
|          | 6FDA-PFODA-cis              | 2.44 | 3.1  | 1.249 | 2.48 |               |
|          | PFODPA-TFMB                 | 2.46 | 2.7  | 1.241 | 2.18 |               |
|          | 6FDA-co-PFODPA-PFODA        | 2.37 | 2.2  | 1.241 | 1.77 |               |
|          | 6FDA-TFMB                   | 2.78 | 2.5  | 1.283 | 1.95 |               |
|          | CYTOP®                      | 2.1  | 1.3  | 2.03  | 0.64 | <sup>13</sup> |
| 2DPs     | TAPB-TPOC <sub>x</sub> -COF | 1.2  | 1.4  | 0.4   | 3.50 | <sup>14</sup> |
|          | 2DP-F                       | 1.85 | 16.8 | 0.46  | 36.5 | This work     |

**Supplementary Table 1.** Meta-analysis of other low-k dielectrics with reported Young's modulus

## Supplementary References

1. Krishtab, M. *et al.* Vapor-deposited zeolitic imidazolate frameworks as gap-filling ultra-low-k dielectrics. *Nature Communications* **10**, 3729 (2019).
2. Eslava, S. *et al.* Metal-Organic Framework ZIF-8 Films As Low-k Dielectrics in Microelectronics. *Chemistry of Materials* **25**, 27-33 (2013).
3. Babal, A.S., Chaudhari, A.K., Yeung, H.H.-M. & Tan, J.-C. Guest-Tunable Dielectric Sensing Using a Single Crystal of HKUST-1. *Advanced Materials Interfaces* **7**, 2000408 (2020).
4. Li, Z. *et al.* Mechanical and Dielectric Properties of Pure-Silica-Zeolite Low-k Materials. *Angewandte Chemie International Edition* **45**, 6329-6332 (2006).
5. Tiriolo, R. *et al.* Sub-Micrometer Zeolite Films on Gold-Coated Silicon Wafers with Single-Crystal-Like Dielectric Constant and Elastic Modulus. *Advanced Functional Materials* **27**, 1700864 (2017).
6. Zeng, M., Zhang, J. & Wang, Y. Investigation of the impact of annealing temperature on characteristics of porous SiOCH films. *Journal of Physics: Conference Series* **2563**, 012033 (2023).
7. Zhou, W. *et al.* Elastic properties of porous low-k dielectric nano-films. *Journal of Applied Physics* **110**, 043520 (2011).
8. Zhou, D.-L. *et al.* Linker engineering of larger POSS-based ultra-low-k dielectrics toward outstanding comprehensive properties. *Giant* **14**, 100146 (2023).
9. Qian, C. *et al.* Facile Strategy for Intrinsic Low-k Dielectric Polymers: Molecular Design Based on Secondary Relaxation Behavior. *Macromolecules* **52**, 4601-4609 (2019).
10. Feng, Y., Jin, K., Guo, J. & Wang, C. All-carbocycle hydrocarbon thermosets with high thermal stability and robust mechanical strength for low-k interlayer dielectrics. *Polymer Chemistry* **12**, 4812-4821 (2021).
11. Sun, Y. *et al.* Preparation and Characterization of Intrinsic Low-k Polyimide Films. *Polymers* **13**, 4174 (2021).
12. Peng, W., Lei, H., Qiu, L., Bao, F. & Huang, M. Perfluorocyclobutyl-containing transparent polyimides with low dielectric constant and low dielectric loss. *Polymer Chemistry* **13**, 3949-3955 (2022).
13. Fong, N.R., Berini, P. & Tait, R.N. Mechanical Properties of Thin Free-Standing CYTOP Membranes. *Journal of Microelectromechanical Systems* **19**, 700-705 (2010).
14. Shao, P. *et al.* Flexible Films of Covalent Organic Frameworks with Ultralow Dielectric Constants under High Humidity. *Angewandte Chemie International Edition* **57**, 16501-16505 (2018).
